# Supplementary material for: Association between Mortality and Cardiovascular Diseases in Vulnerable Mexican Populations, A Retrospective Study of the COVID-19 Pandemic
Source: Preprints.org preprint supplement (doi:10.20944/preprints202206.0189.v1), 2022-06-14
Supplement: Supplementary file 1 [file supplementary]

## Sheet: Sheet1
Supplemental Table 1 Individual comorbidities (hypertension, diabetes and obesity), Patient type, COVID-19 diagnosis, and death reported by gender and age
		Hypertension				Diabetes				Obesity
		Yes		No		Yes		No		Yes		No
	Gender	n	%	n	%	n	%	n	%	n	%	n	%	Total
0 - 17	Female	52	0.0023962	944	0.0435003	22	0.00101378	974	0.0448827	55	0.00253445	941	0.0433621	996
	Male	52	0.00257668	981	0.0486101	31	0.0015361	1002	0.0496507	68	0.00336951	965	0.0478173	1033
18 - 30	Female	237	0.0109212	1792	0.0825768	118	0.00543754	1911	0.0880605	372	0.0171421	1657	0.0763559	2029
	Male	262	0.0129825	1506	0.0746246	95	0.0047074	1673	0.0828998	302	0.0149646	1466	0.0726426	1768
31 - 40	Female	431	0.0198608	1724	0.0794433	199	0.00917008	1956	0.0901341	484	0.0223031	1671	0.0770011	2155
	Male	493	0.0244289	1308	0.0648134	212	0.0105049	1589	0.0787374	459	0.0227442	1342	0.0664982	1801
41 - 50	Female	1165	0.0536842	2331	0.107414	657	0.0302751	2839	0.130823	989	0.0455739	2507	0.115525	3496
	Male	1130	0.0559933	1579	0.0782419	610	0.0302265	2099	0.104009	770	0.0381547	1939	0.0960805	2709
51 - 60	Female	2187	0.100779	2366	0.109027	1416	0.0652504	3137	0.144556	1367	0.0629925	3186	0.146814	4553
	Male	2270	0.112482	1868	0.0925623	1468	0.0727417	2670	0.132303	1076	0.0533175	3062	0.151727	4138
61- 70	Female	2352	0.108382	1548	0.0713331	1608	0.074098	2292	0.105617	1150	0.0529929	2750	0.126722	3900
	Male	2546	0.126158	1701	0.0842872	1775	0.087954	2472	0.122491	861	0.0426639	3386	0.167782	4247
71 - 80	Female	2001	0.0922077	811	0.0373715	1229	0.0566333	1583	0.0729459	691	0.0318419	2121	0.0977374	2812
	Male	1941	0.0961796	1026	0.0508399	1279	0.0633764	1688	0.083643	482	0.0238839	2485	0.123136	2967
81 and more	Female	1312	0.060458	448	0.0206442	643	0.02963	1117	0.0514723	310	0.0142851	1450	0.0668172	1760
	Male	974	0.0482632	544	0.026956	517	0.0256182	1001	0.0496011	176	0.00872107	1342	0.0664982	1518
	Female	9737	0.448689	11964	0.551311	5892	0.271508	15809	0.728492	5418	0.249666	16283	0.750334	21701
	Male	9668	0.479064	10513	0.520936	5987	0.296665	14194	0.703335	4194	0.207819	15987	0.792181	20181
		19405		22477		11879		30003		9612		32270		41882
		Patient Type				COVID-19						Death
		Hospitalized		Ambulatory		Yes		No		Unknown /untested		Yes		No
	Gender	n	%	n	%	n	%	n	%	n	%	n	%	n	%	Total
0 - 17	Female	342	0.0157596	654	0.0301369	217	0.00999954	716	0.0329939	63	0.00290309	15	0.000691212	981	0.0452053	996
	Male	328	0.0162529	705	0.0349338	233	0.0115455	741	0.0367177	59	0.00292354	21	0.00104058	1012	0.0501462	1033
18 - 30	Female	100	0.00460808	1929	0.0888899	650	0.0299525	1322	0.0609189	57	0.00262661	27	0.00124418	2002	0.0922538	2029
	Male	97	0.0048065	1671	0.0828007	542	0.0268569	1171	0.0580249	55	0.00272534	13	0.00064417	1755	0.086963	1768
31 - 40	Female	141	0.0064974	2014	0.0928068	736	0.0339155	1353	0.0623474	66	0.00304133	26	0.0011981	2129	0.0981061	2155
	Male	198	0.00981121	1603	0.0794311	636	0.0315148	1077	0.053367	88	0.00436054	59	0.00292354	1742	0.0863188	1801
41 - 50	Female	274	0.0126261	3222	0.148472	1220	0.0562186	2175	0.100226	101	0.00465416	61	0.00281093	3435	0.158288	3496
	Male	438	0.0217036	2271	0.112532	1018	0.0504435	1576	0.0780933	115	0.00569843	124	0.00614439	2585	0.128091	2709
51 - 60	Female	586	0.0270034	3967	0.182803	1493	0.0687987	2905	0.133865	155	0.00714253	174	0.00801806	4379	0.201788	4553
	Male	993	0.0492047	3145	0.15584	1668	0.082652	2301	0.114018	169	0.00837421	338	0.0167484	3800	0.188296	4138
61- 70	Female	906	0.0417492	2994	0.137966	1432	0.0659877	2320	0.106908	148	0.00681996	335	0.0154371	3565	0.164278	3900
	Male	1399	0.0693226	2848	0.141123	1768	0.0876072	2263	0.112135	216	0.0107031	570	0.0282444	3677	0.182201	4247
71 - 80	Female	977	0.045021	1835	0.0845583	1072	0.0493986	1589	0.0732224	151	0.0069582	398	0.0183402	2414	0.111239	2812
	Male	1349	0.0668451	1618	0.0801744	1282	0.0635251	1514	0.0750211	171	0.00847332	655	0.0324563	2312	0.114563	2967
81 and more	Female	818	0.0376941	942	0.0434081	711	0.0327635	940	0.043316	109	0.00502281	362	0.0166813	1398	0.064421	1760
	Male	828	0.0410287	690	0.0341906	685	0.0339428	696	0.0344879	137	0.00678856	459	0.0227442	1059	0.0524751	1518
	Female	4144	0.190959	17557	0.809041	7531	0.347035	13320	0.613797	850	0.0391687	1398	0.064421	20303	0.935579	21701
	Male	5630	0.278975	14551	0.721025	7832	0.388088	11339	0.561865	1010	0.0500471	2239	0.110946	17942	0.889054	20181
		9774		32108		15363		24659		1860		3637		38245		41882
