# Supplementary material for: Association between Mortality and Cardiovascular Diseases in Vulnerable Mexican Populations, A Retrospective Study of the COVID-19 Pandemic
Source: Preprints.org preprint supplement (doi:10.20944/preprints202206.0189.v1), 2022-06-14
Supplement: Supplementary file 3 [file Supplemental Table 2.xlsx]

## Sheet: Sheet1
Supplemental Table 2 Individual comorbidities correlated to death in CVD´s patients
Death relation to hypertension							Death relation to diabetes							Death relation to obesity
Cross Tables							Cross Tables							Cross Tables
			Death							Death							Death
			Yes	No	Total					Yes	No	Total					Yes	No	Total
Hypertension	Yes	Counts	2499	16906	19405		Diabetes	Yes	Counts	1697	10182	11879		Obesity	Yes	Counts	987	8625	9612
		% of Total	0.0596676	0.403658	0.463326				% of Total	0.0405186	0.243112	0.28363				% of Total	0.0235662	0.205936	0.229502
	No	Counts	1138	21339	22477			No	Counts	1940	28063	30003			No	Counts	2650	29620	32270
		% of Total	1138	21339	22477				% of Total	0.0463206	0.670049	0.71637				% of Total	0.063273	0.707225	0.770498
Total		Counts	3637	38245	41882		Total		Counts	3637	38245	41882		Total		Counts	3637	38245	41882
		% of Total	0.0868392	0.913161	1				% of Total	0.0868392	0.913161	1				% of Total	0.0868392	0.913161	1
chi-square tests							chi-square tests							chi-square tests
	Value	df	Asymptotic significance (bilateral)	Exact significance (bilateral)	Exact significance (unilateral)			Value	df	Asymptotic significance (bilateral)	Exact significance (bilateral)	Exact significance (unilateral)			Value	df	Asymptotic significance (bilateral)	Exact significance (bilateral)	Exact significance (unilateral)
Pearson´s Chi-squared	802.118a	1	1.86859e-176				Pearson´s Chi-squared	656.196a	1	1.00374e-144				Pearson´s Chi-squared	39.497a	1	3.28631e-10
Continuity Correction	801.133	1	3.06e-176				Continuity Correction	655.21	1	1.64437e-144				Continuity Correction	39.2377	1	3.75226e-10
Verisimilitude	811.364	1	1.82523e-178				Verisimilitude	602.944	1	3.83261e-133				Verisimilitude	38.1138	1	6.67367e-10
Fisher exact test				1.5582e-176	1.54472e-176		Fisher exact test				1.11791e-133	8.28649e-145		Fisher exact test				4.77974e-10	1.87703e-10
Linear association	802.099	1	1.88659e-176				Linear association	656.18	1	1.01165e-144				Linear association	39.4957	1	3.2879e-10
# of valid cases	41882						# of valid cases	41882						# of valid cases	41882
a. 0 cells (0.0%) with expected counts less than 5. The minimum count expected is							a. 0 cells (0.0%) with expected counts less than 5. The minimum count expected is 1031.56							a. 0 cells (0.0%) with expected counts less than 5. The minimum count expected is 834.7
b. Table 2X2							b. Table 2X2							b. Table 2X2
Symetric measures							Symetric measures							Symetric measures
		Value	asymptotic standard error	approx. Tb	approx. significance				Value	asymptotic standard error	approx. Tb	approx. significance				Value	asymptotic standard error	approx. Tb	approx. significance
Interval	Pearson´s R	0.13839	0.0046796	28.5962	.000c		Interval	Pearson´s R	0.125171	0.00541417	25.8188	.000c		Interval	Pearson´s R	0.030709	0.00514296	6.28745	.000c
Ordinal	Spearman correlation	0.13839	0.0046796	28.5962	.000c		Ordinal	Spearman correlation	0.125171	0.00541417	25.8188	.000c		Ordinal	Spearman correlation	0.030709	0.00514296	6.28745	.000c
# of valid cases		41882					# of valid cases		41882					# of valid cases		41882
a. Null hypothesis is not asumed							a. Null hypothesis is not asumed							a. Null hypothesis is not asumed
b. Use of the asymptotic standard error that assumes the null hypothesis.							b. Use of the asymptotic standard error that assumes the null hypothesis.							b. Use of the asymptotic standard error that assumes the null hypothesis.
c. It is based on normal approximation.							c. It is based on normal approximation.							c. It is based on normal approximation.
